# Supplementary material for: Chronic obstructive pulmonary disease exacerbation purulence status and its association with pulmonary embolism: protocol for a systematic review with meta-analysis
Source: PubMed Central journal article supplement — BMJ Open. 2024 Jun 19;14(6):e085328. doi: 10.1136/bmjopen-2024-085328 (PMC11191811; doi:10.1136/bmjopen-2024-085328), 2024-06-19
Supplement: bmjopen-2024-085328supp001.pdf [file bmjopen-2024-085328supp001.pdf]

**Chronic obstructive pulmonary disease exacerbation purulence status and its association  
with pulmonary embolism: protocol for a systematic review with meta-analysis**

**Supplemental file**

Vicky Mai<sup>1</sup>, Laura Girardi<sup>1,2</sup>, Kerstin de Wit<sup>3</sup>, Lana A. Castellucci<sup>1</sup>, Shawn Aaron<sup>4</sup>, Francis Couturaud<sup>5</sup>, Dean Fergusson<sup>6</sup>, Grégoire Le Gal<sup>1</sup>

<sup>1</sup> Department of Medicine, Ottawa Hospital Research Institute, University of Ottawa, Ottawa, Canada.

<sup>2</sup> Department of Medicine and Surgery, University of Insubria, Varese, Italy.

<sup>3</sup> Department of Emergency Medicine and Medicine, Queens University, Kingston.

<sup>4</sup> Department of Medicine, Faculty of Medicine, Division of Respiriology, University of Ottawa, Ottawa, Ontario, Canada.

<sup>5</sup> INSERM U1304-GETBO, CIC INSERM 1412, Univ\_Brest, Département de Médecine Interne et Pneumologie, CHU\_Brest, Brest, FCRIN INNOVTE, France.

<sup>6</sup> Clinical Epidemiology Program, Ottawa Hospital Research Institute, Ottawa, Ontario, Canada.

**Corresponding author:**

Grégoire Le Gal  
Ottawa Hospital Research Institute – University of Ottawa  
501 Smyth Road, Ottawa, ON, Canada, K1H 8L6  
E-mail: glegal@toh.ca

## APPENDIX 1

### Search strategy MEDLINE

1. "Chronic obstructive pulmonary disease".ab,kw,ti.
2. Pulmonary disease, Chronic obstructive/
3. "Chronic obstructive lung disease".ab,kw,ti.
4. "Chronic obstructive airway disease".ab,kw,ti.
5. "Chronic airflow obstruction".ab,kw,ti.
6. COPD.ab,kw,ti.
7. "Chronic bronchitis".ab,kw,ti.
8. Bronchitis, Chronic/
9. "Pulmonary emphysema".ab,kw,ti.
10. Pulmonary emphysema/
11. #1 OR #2 OR #3 OR #4 OR #5 OR #6 OR #7 OR #8 OR #9 OR #10
12. "Venous thrombos\*".ab,kw,ti.
13. Venous thrombosis/
14. "Vein thrombosis".ab,kw,ti.
15. "Vein thromboembolism".ab,kw,ti.
16. "Pulmonary embolism".ab,kw,ti.
17. Pulmonary embolism/
18. "Pulmonary embolisms".ab,kw,ti.
19. "Pulmonary thromboembolism".ab,kw,ti.
20. "Lung embolism".ab,kw,ti.
21. "Lung embolisms".ab,kw,ti.

22. "Lung thromboembolism".ab,kw,ti.
  23. "Venous thromboembolism".ab,kw,ti.
  24. Venous thromboembolism/
  25. #12 OR #13 OR #14 OR #15 OR #16 OR #17 OR #18 OR #19 OR #20 OR #21 OR #22  
OR #23 OR #24
- #11 AND #25

### Search strategy Embase

1. "Chronic obstructive pulmonary disease".ab,ti,kw
2. "Chronic obstructive pulmonary disease"/
3. "Chronic obstructive lung disease".ab,ti,kw
4. "Chronic obstructive airway disease".ab,ti,kw
5. "Chronic airflow obstruction".ab,ti,kw
6. COPD.ab,ti,kw
7. "Chronic bronchitis".ab,ti,kw
8. "Chronic bronchitis"/
9. "Pulmonary emphysema".ab,ti,kw
10. "Pulmonary emphysema"/
11. #1 OR #2 OR #3 OR #4 OR #5 OR #6 OR #7 OR #8 OR #9 OR #10
12. "Venous Thrombos\*".ti,ab,kw
13. "Venous thromboembolism".ti,ab,kw
14. "Vein Thrombos\*".ti,ab,kw
15. "Vein thromboembolism".ti,ab,kw

16. "Vein thrombosis"/
  17. "Pulmonary embolism".ti,ab,kw
  18. "Pulmonary embolisms".ti,ab,kw
  19. "Pulmonary thromboembolism".ti,ab,kw
  20. "Lung embolism".ti,ab,kw
  21. "Lung embolisms".ti,ab,kw
  22. "Lung thromboembolism".ti,ab,kw
  23. "Lung embolism"/
  24. #12 OR #13 OR #14 OR #15 OR #16 OR #17 OR #18 OR #19 OR #20 OR #21 OR #22  
OR #23
- #11 AND #24

### Search strategy CENTRAL

1. "Chronic obstructive pulmonary disease".ab,kw,ti.
2. Pulmonary disease, Chronic obstructive/
3. "Chronic obstructive lung disease".ab,kw,ti.
4. "Chronic obstructive airway disease".ab,kw,ti.
5. "Chronic airflow obstruction".ab,kw,ti.
6. COPD.ab,kw,ti.
7. "Chronic bronchitis".ab,kw,ti.
8. Bronchitis, Chronic/
9. "Pulmonary emphysema".ab,kw,ti.
10. Pulmonary emphysema/

11. #1 OR #2 OR #3 OR #4 OR #5 OR #6 OR #7 OR #8 OR #9 OR #10
  12. “Venous thrombos\*”.ab,kw,ti.
  13. Venous thrombosis/
  14. “Vein thrombosis”.ab,kw,ti.
  15. “Vein thromboembolism”.ab,kw,ti.
  16. “Pulmonary embolism”.ab,kw,ti.
  17. Pulmonary embolism/
  18. “Pulmonary embolisms”.ab,kw,ti.
  19. “Pulmonary thromboembolism”.ab,kw,ti.
  20. “Lung embolism”.ab,kw,ti.
  21. “Lung embolisms”.ab,kw,ti.
  22. “Lung thromboembolism”.ab,kw,ti.
  23. “Venous thromboembolism”.ab,kw,ti.
  24. Venous thromboembolism/
  25. #12 OR #13 OR #14 OR #15 OR #16 OR #17 OR #18 OR #19 OR #20 OR #21 OR #22  
OR #23 OR #24
- #11 AND #25
